# Supplementary material
Source: PubMed Central journal article supplement (PMC4363414)
Supplement: IAI.02827-14_zii999091166so1.pdf [file IAI.02827-14_zii999091166so1.pdf]

**TABLE S1 Primers used in this study**

| <b>Primer</b>     | <b>Sequence</b>                                   |
|-------------------|---------------------------------------------------|
| NAT-F             | AGCGGATAACAATTTACACAGGA                           |
| NAT-R             | CGCCAGGGTTTTCCAGTCACGAC                           |
| CAP60up-F         | TGGCACCACAACATCTGGGA                              |
| CAP60up-R         | ACAACGTCGTGACTGGGAAAACCCTGGCGATCGGTGACGGATGAGGGAT |
| CAP60down-F       | CTGTTTCCTGTGTGAAATTGTTATCCGCTCGGGCTTCTAATGCACAGGT |
| CAP60down-R       | GAAATGATGGTCACTCGACA                              |
| CAP60up-NotI-F    | AAAAGCGGCCGCGCACCAACATCTGGGA                      |
| CAP60down-SacII-R | AAAACCGCGGGAAATGATGGTCACTCGACA                    |
| CAP60rt-F         | ACTCAACAACGCCGCCATGG                              |
| NATcheck-F1       | GTCACCAACGTCAACGCACC                              |
| CAP60-downR1      | GGAGGCGGAGTTAAAAGCAA                              |

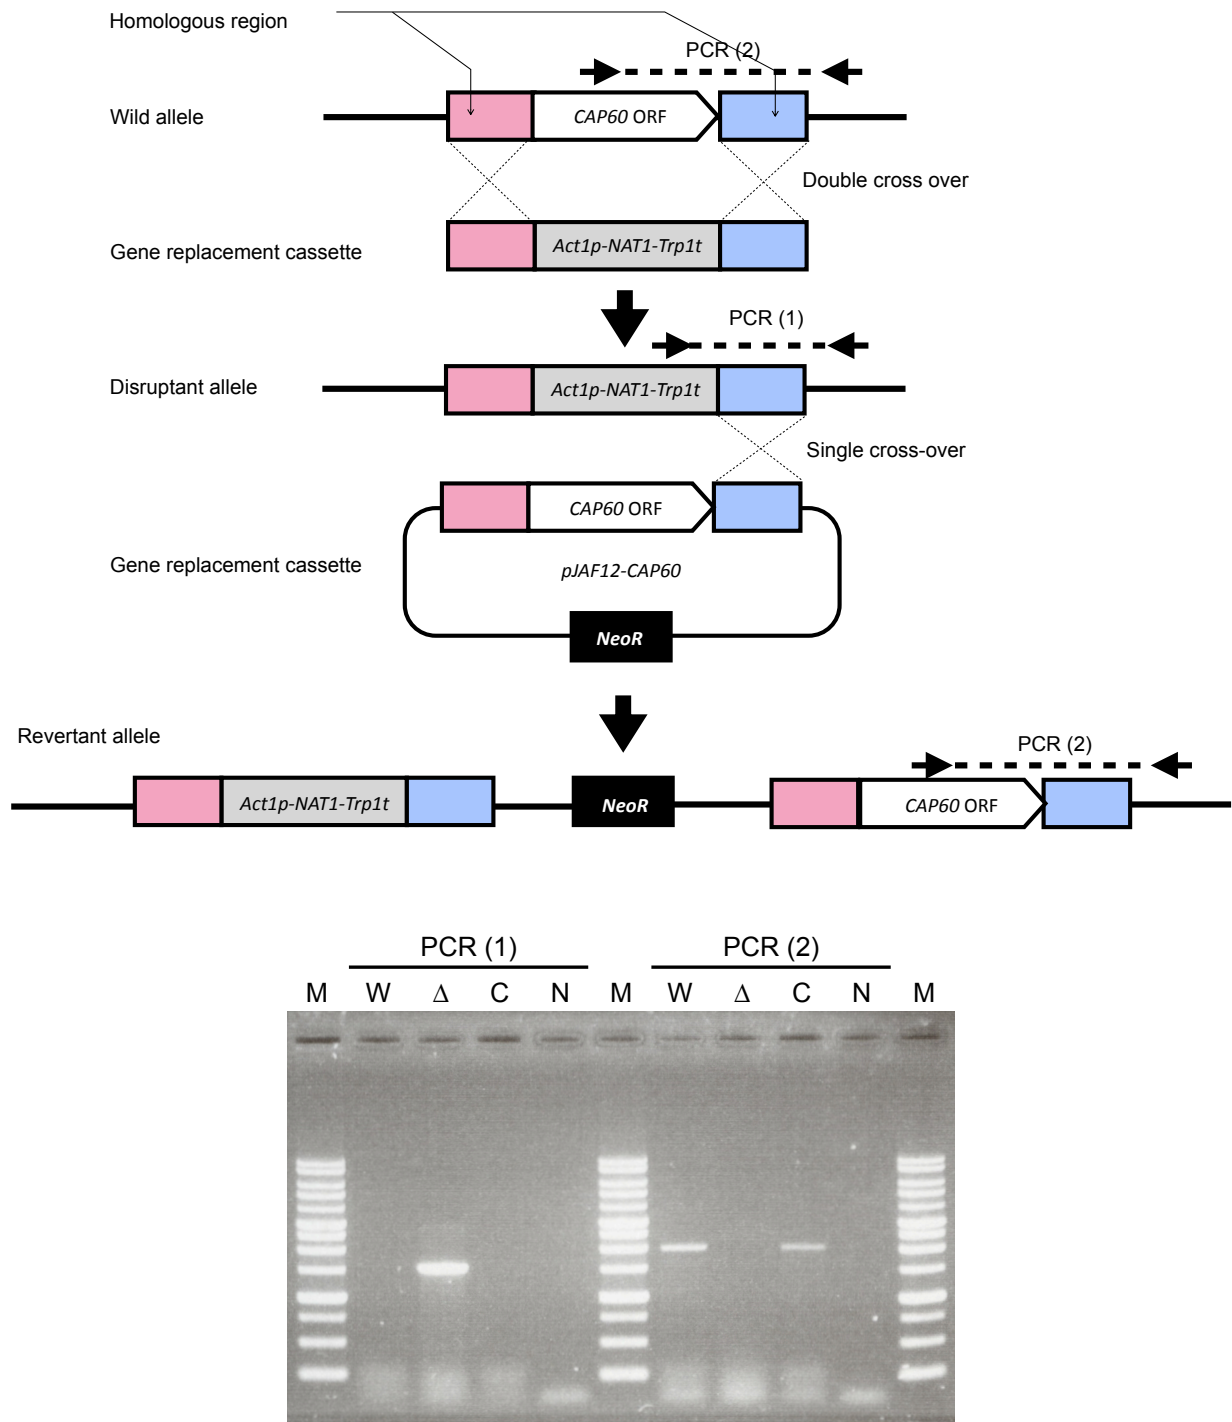

**FIG S1 Gene disruption and reintegration.** *CAP60* ORF, the region from the ATG start codon to the TAG stop codon, was completely deleted by homologous recombination. Deletant *CAP60*Δ was nourseothricin resistant, as it had nourseothricin resistant gene *NAT1* in its *CAP60* locus. Complement vector pJAF12-*CAP60* was integrated into the *CAP60* locus of deletant *CAP60*Δ to generate revertant *CAP60*C. Because the complement vector harbored the geneticin resistant gene *NeoR*, revertant *CAP60*C was geneticin/nourseothricin double resistant. Two PCRs were used to confirm the intended recombination in transformants. The primers used for PCR were: (1) *CAP60*rt-F and *Cap60*-downR1 and (2) *NAT*check-F1 and *Cap60*-downR1; M: 1 kb ladder, W: wild type strain PNG18, Δ: deletant *CAP60*Δ, C: revertant *CAP60*C, N: non-template control.

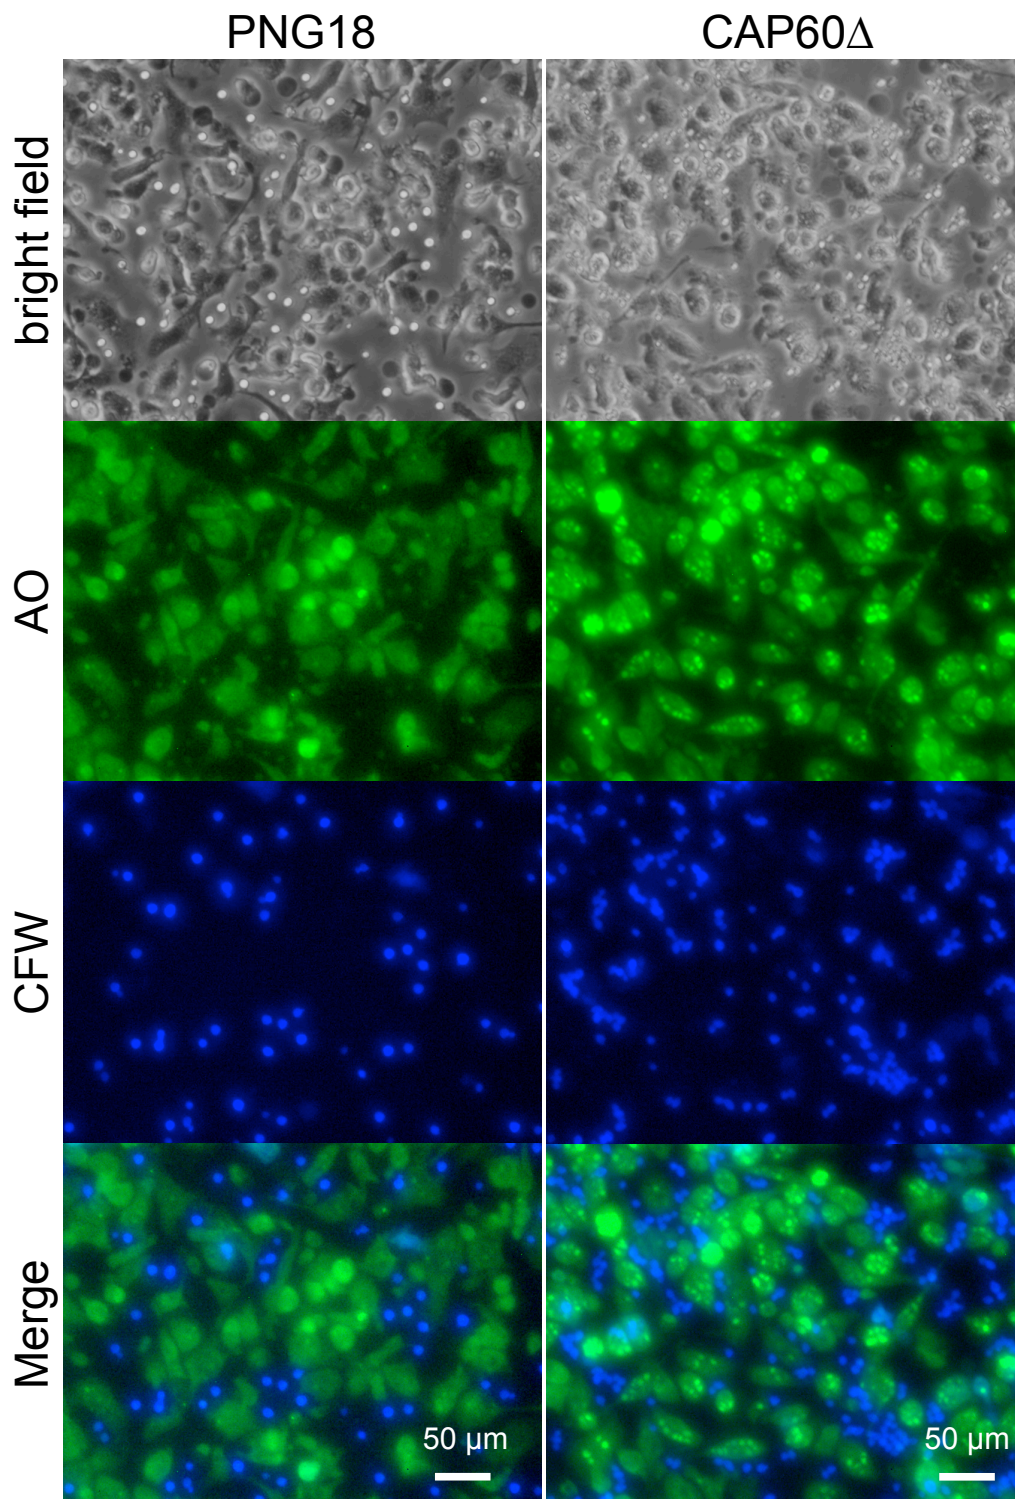

**FIG S2 Several CAP60 $\Delta$  cells are engulfed by each BMDC.** Prior to incubation, heat-killed *C. gattii* cells were stained with acridine-orange (AO: green), which binds to nucleic acids. After 24 h incubation for phagocytosis, these cells were stained with calcofluor white (CFW: blue), which binds to chitin in the cell wall. Because this fluorescent dye did not enter BMDCs, engulfed fungal cells were not stained by calcofluor white.

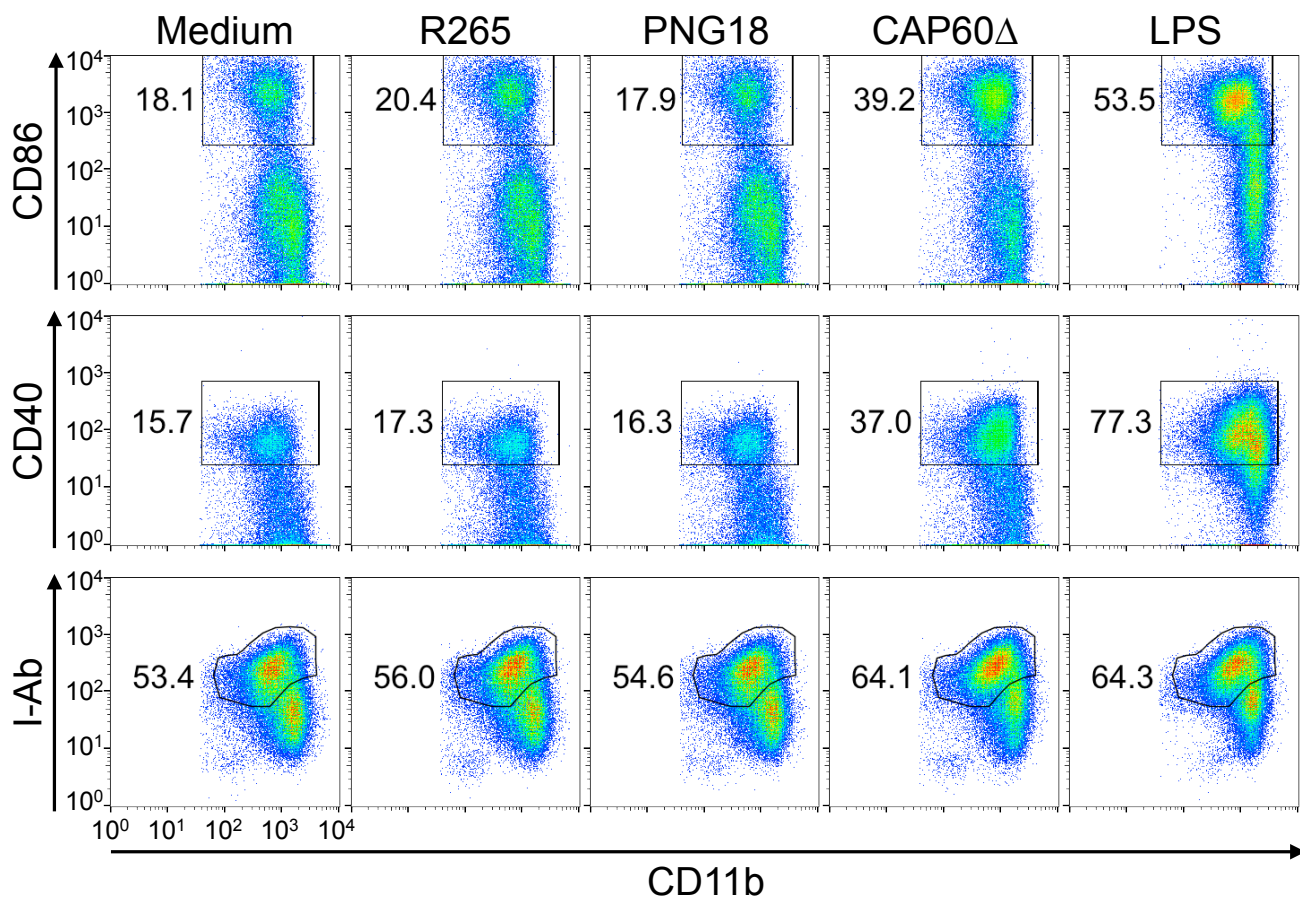

**FIG S3 CAP60 $\Delta$  induces BMDCs to express co-stimulatory molecules.** BMDCs ( $2 \times 10^6$  cells/ml) were incubated with heat-killed strain R265 cells, CAP60 $\Delta$  cells (MOI = 0.1), or 100 ng/ml of LPS for 24 h. BMDCs were collected and stained for CD11c, CD11b, CD86, CD40, and I-Ab. For flow cytometry analysis, gates were set for CD11c+ CD11b+ cells.

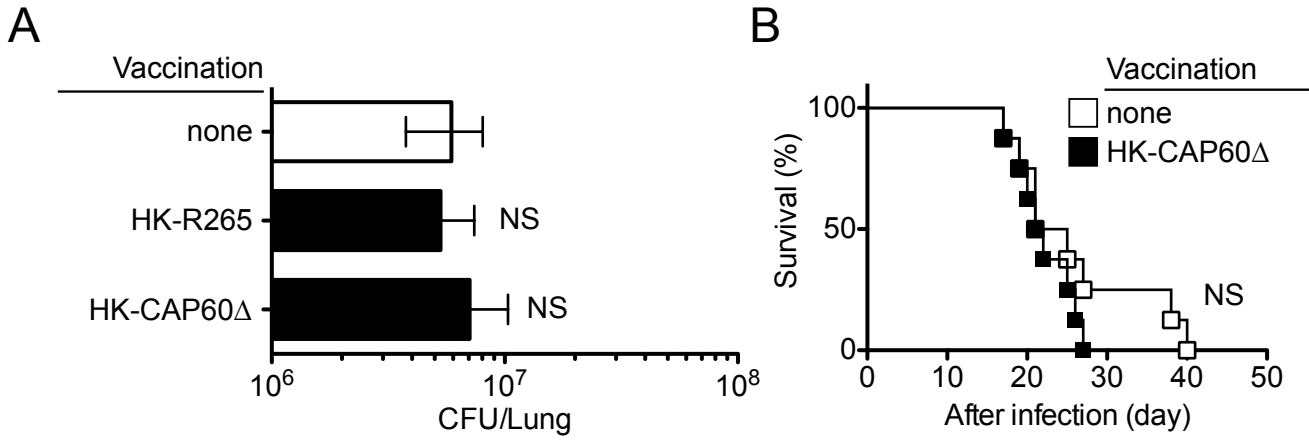

**FIG S4 Vaccination using heat-killed fungal cells does not ameliorate pulmonary infection with highly virulent *C. gattii* strain R265.** Heat-killed fungal cells, HK-R265 or HK-CAP60 $\Delta$  ( $5 \times 10^6$  cells/mouse), were administered intravenously to mice, both at 14 days and at 1 day prior to intratracheal infection with R265 ( $3 \times 10^3$  CFUs/mouse). Fungal burdens at day 14 post-infection (A) and survival rates (B) were determined as described in Figure 2. Median survivals: non-vaccination = 23 days; HK-CAP60 $\Delta$  transfer = 21.5 days.

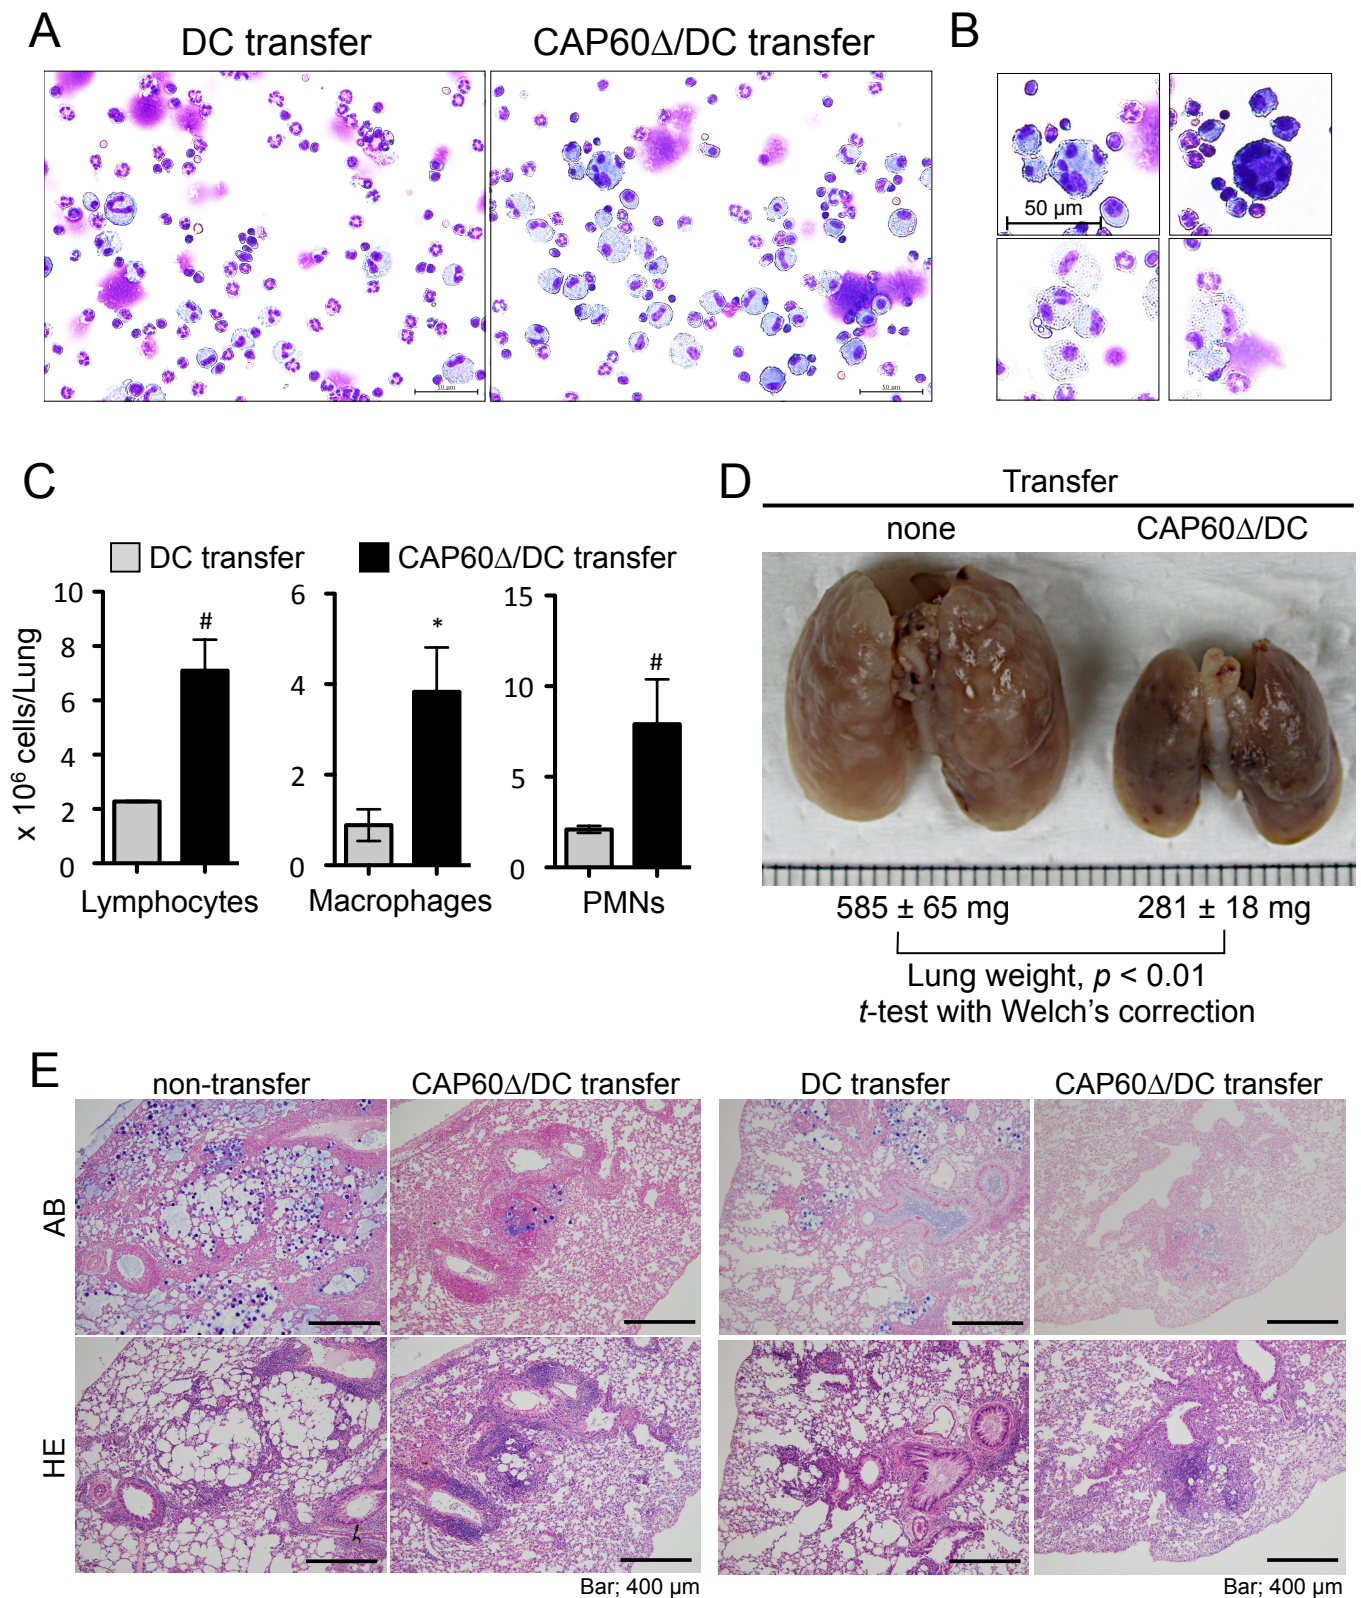

**FIG S5 DC-based vaccine induces lung leukocyte recruitment and ameliorates lung pathology.** Lung leukocytes were stained using Diff-Quick (A-B) and cell numbers were determined (C) at day 7 post-transfer. Multi-nucleated cells were found in the lungs of CAP60 $\Delta$ /DC injected mice (B). Histograms show results expressed as means  $\pm$  SD, \*  $p < 0.05$  vs. control by unpaired *t*-test, #  $p < 0.05$  vs. control by unpaired *t*-test with Welch's correction. Similar results were obtained at day 9 post-transfer (C). Gross pathology and lung sections were assessed at day 13 post-infection (D-E). Lung sections were stained with hematoxylin-eosin [HE] or alcian blue [AB], as described in Figure 3, and observed at a magnification of  $\times 100$ .

**TABLE S2 Statistical analysis for lung sections**

| Three mice per group for evaluation                                                 | non-transfer                | CAP60 $\Delta$ /DC          | <i>p</i> -value |
|-------------------------------------------------------------------------------------|-----------------------------|-----------------------------|-----------------|
| A. Alveolar space (Cross point interval, $\mu\text{m}$ )                            | $68.6 \pm 38.0$<br>n = 1072 | $52.4 \pm 25.7$<br>n = 1038 | <i>p</i> < 0.01 |
| B. Variance of alveolar space<br>(Variance of cross point interval, $\mu\text{m}$ ) | $38.0 \pm 0.753$<br>n = 3   | $25.6 \pm 1.06$<br>n = 3    | <i>p</i> < 0.01 |
| C. The number of MGCs (MGCs/ $\text{mm}^2$ )                                        | $0.43 \pm 0.14$<br>n = 6    | $1.1 \pm 0.46$<br>n = 6     | <i>p</i> < 0.05 |
| D. The number of nuclei per MGC                                                     | $3.7 \pm 2.2$<br>n = 273    | $7.0 \pm 5.5$<br>n = 378    | <i>p</i> < 0.01 |
| E. Nuclear density in MGC (nuclei/1000 $\mu\text{m}^2$ )                            | $4.2 \pm 2.4$<br>n = 116    | $8.8 \pm 4.4$<br>n = 108    | <i>p</i> < 0.01 |

Detail methods are described in Material and Methods. Values are means  $\pm$  SD. *P*-value in Column B was derived from unpaired *t*-test and the other *p*-values were derived from unpaired *t*-tests with Welch's correction.

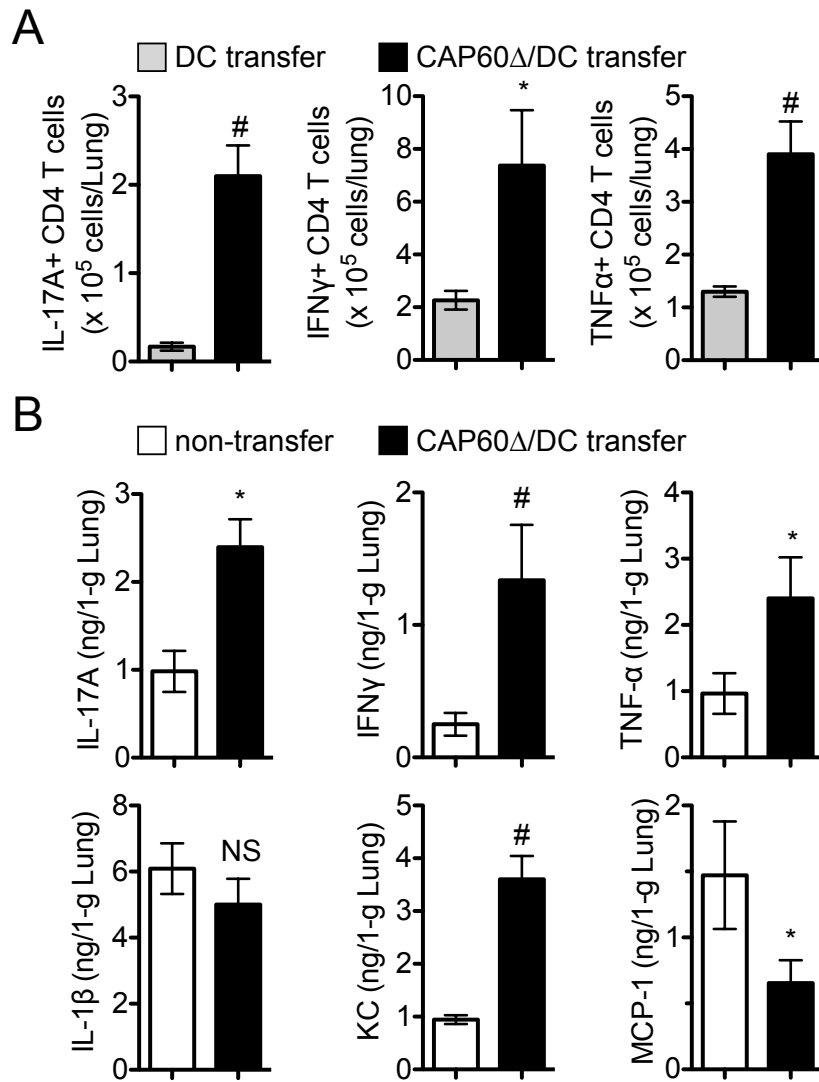

**FIG S6 Transferring CAP60 $\Delta$ /DCs induces cytokine production in lung.** (A) Lung leukocytes were collected from three mice at 7 days post-transfer and stimulated with PMA and ionomycin for 3 h. For flow cytometry analysis, gates were set for CD3+ cells. Total numbers of CD4 T cells that expressed intracellular IL-17A, IFN $\gamma$ , or TNF $\alpha$  were determined. Representative data from two separate experiments are expressed as means  $\pm$  SD, \*  $p < 0.05$  vs. control by unpaired  $t$ -test, #  $p < 0.05$  vs. control by unpaired  $t$ -test with Welch's correction. (B) Lungs were harvested from five mice at 14 days post-injection. Cytokine levels in lung homogenates were determined by ELISA. Representative data from three or four independent experiments are shown. Histogram results are means  $\pm$  SD, \*  $p < 0.05$  vs. control by unpaired  $t$ -test, #  $p < 0.05$  vs. control by unpaired  $t$ -test with Welch's correction.
